# Supplementary material for: Synthesis and physicochemical characterizations of coordination between palladium(ii) metal ions with floroquinolone drugs as medicinal model against cancer cells: novel metallopharmaceuticals
Source: Royal Society of Chemistry journal article supplement (doi:10.1039/c8nj01045e), 2018-01-01
Supplement: c8nj01045e1.pdf [file c8nj01045e1.pdf]

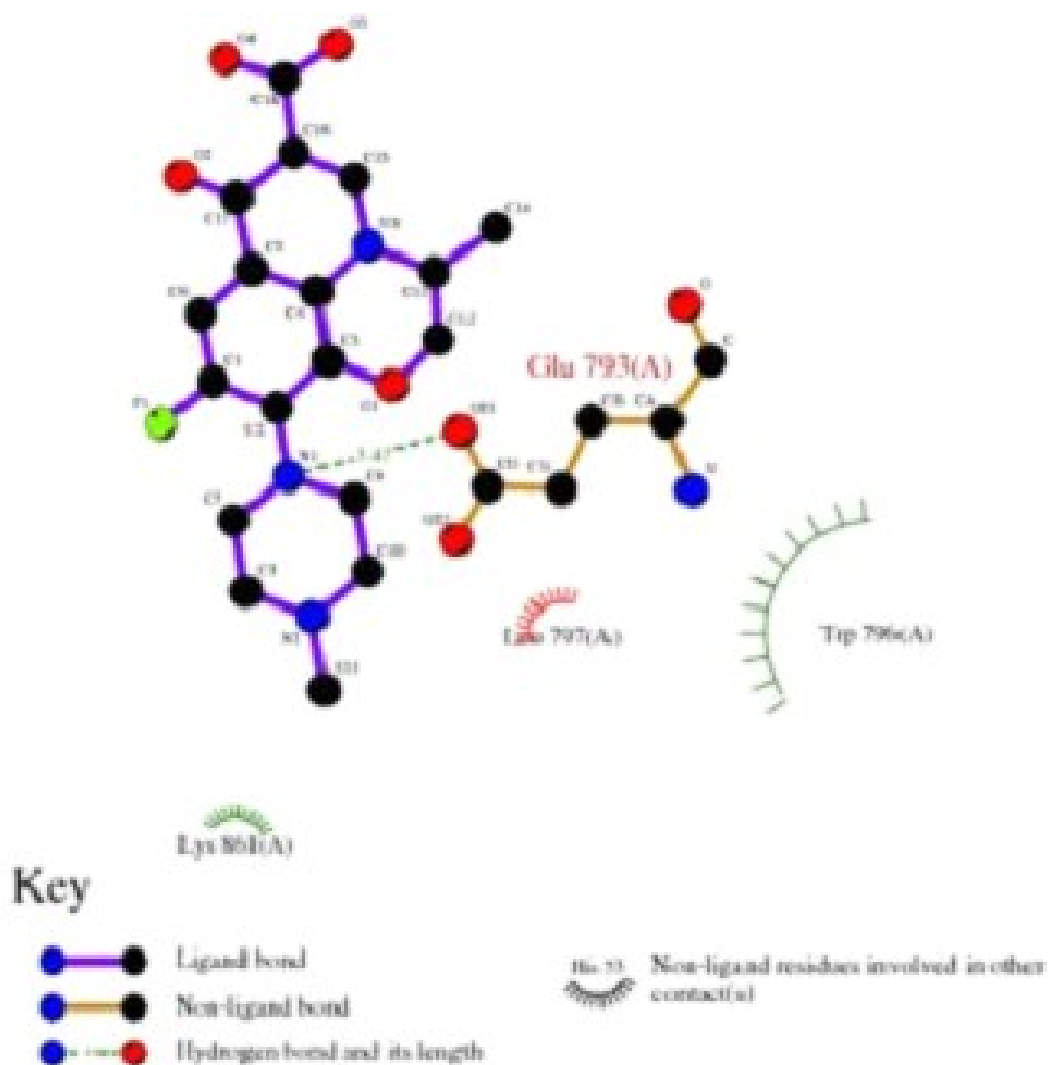

**Fig. 1Sa.** 2D plot of interaction of LVX drug against prostate cancer 2q7k-hormone.

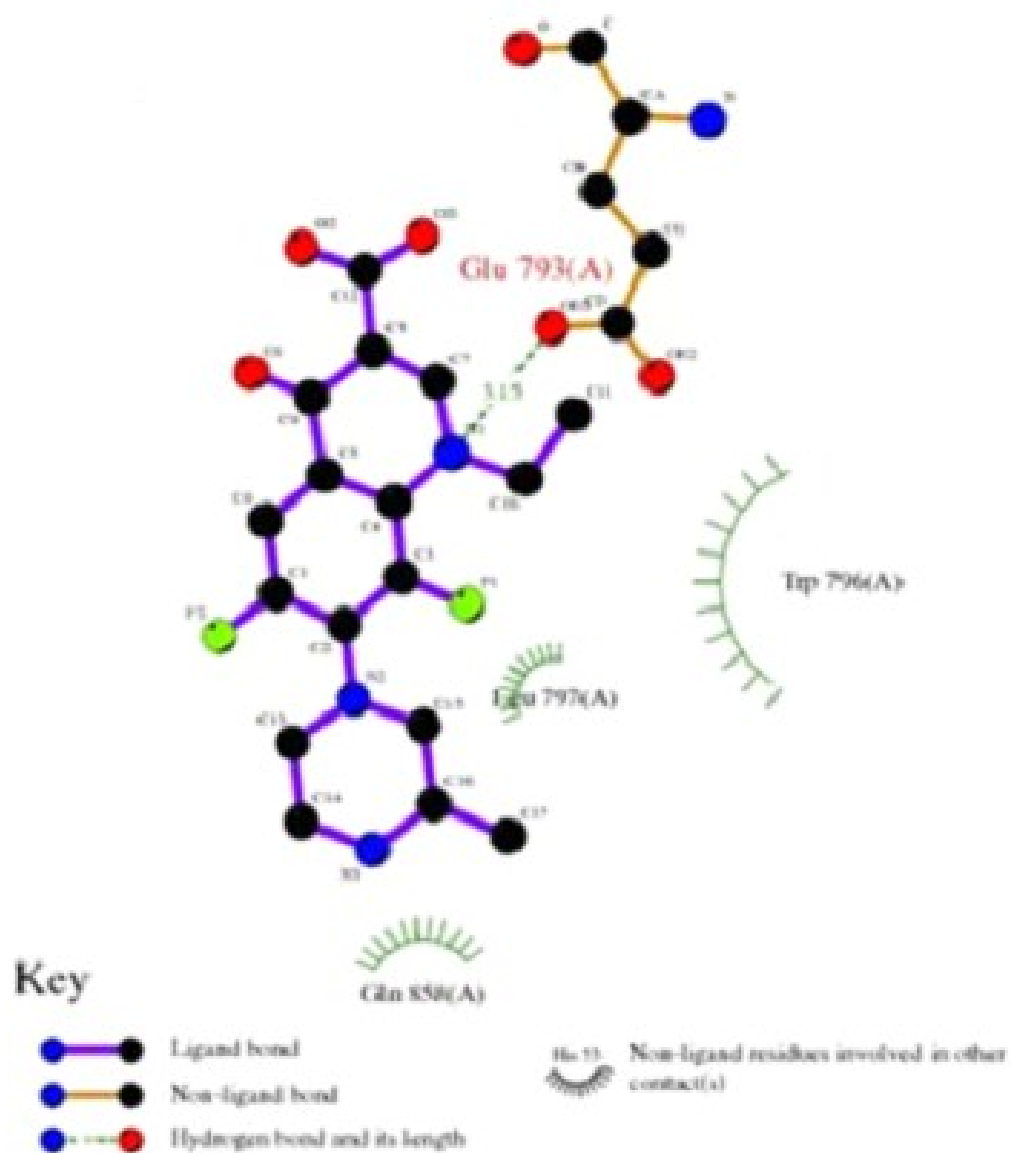

**Fig. 1Sb.** 2D plot of interaction of LMX drug against prostate cancer 2q7k-hormone.
